# Supplementary material for: Sensitive luminescent chemosensing of fluoride based on Eu-doped Zn-LMOF in aqueous media: structural and spectroscopic studies
Source: Royal Society of Chemistry journal article supplement (doi:10.1039/d3ce00434a), 2023-01-01
Supplement: d3ce00434a1.pdf [file d3ce00434a1.pdf]

# Sensitive Luminescent Chemosensing of Fluoride based on Eu-doped Zn-LMOF in Aqueous Media. Structural and Spectroscopic Studies

Paola Toledo-Jaldín,<sup>a,d\*</sup> Cristian Pinzón-Vanegas,<sup>b</sup> Juan Pablo León-Gómez,<sup>b</sup> Alien Blanco Flores,<sup>a</sup>  
Diego Martínez-Otero,<sup>c</sup> Iván A. Reyes Domínguez,<sup>d</sup> Daniel Canseco-González,<sup>e</sup> Luis D. Rosales-  
Vázquez,<sup>b</sup> María K. Salomón-Flores<sup>b</sup> and Alejandro Dorazco-González<sup>b\*</sup>

<sup>a</sup> *Technological Superior Studies Tianguistenco, Mechanical Engineering, Santiago Tianguistenco 52650, México.*

<sup>b</sup> *Institute of Chemistry, National Autonomous University of Mexico, Mexico City 04510.*

<sup>c</sup> *Centro Conjunto de Investigación en Química Sustentable UAEM-UNAM, Instituto de Química, Universidad Nacional Autónoma de México, Toluca 50200 Estado de México, México.*

<sup>d</sup> *Autonomous University of San Luis Potosi, Institute of Metallurgy, San Luis Potosi 78210, México*

<sup>e</sup> *CONACYT-Laboratorio Nacional de Investigación y Servicio Agroalimentario y Forestal, Universidad Autónoma Chapingo, Texcoco de Mora CP 56230*

Corresponding authors: [helenpao27@hotmail.com](mailto:helenpao27@hotmail.com), [adg@unam.mx](mailto:adg@unam.mx)

## Electronic Supporting Information

Table S1 Crystal data and structure refinement for **Zn-LMOF**.

Table S2 Selected bond distances (Å) and angles (°) around Zn atoms.

Table S3 Analytical parameters of recent luminescent materials for F<sup>-</sup> sensing in aqueous media.

Fig. S1 Emission spectra for **Eu<sub>3-24%</sub>@Zn-LMOF**.

Fig. S2 3D diagram from crystal structure of **Zn-LMOF**.

Fig. S3 Simulated and experimental powder X-ray diffraction patterns of **Zn-LMOF**.

Fig. S4 TGA curve of **Zn-LMOF**.

Fig. S5 <sup>13</sup>C ss-CPMAS NMR (spinning rate at 8 kHz) spectrum for **Zn-LMOF**.

Fig. S6 Solid-state excitation and emission spectra of compound **Zn-LMOF**.

Fig. S7 Excitation spectrum of **Eu@Zn-LMOF** at room temperature by monitoring the Eu(III) ions (616 nm).

Fig. S8 ATR-FTIR spectra to assess the **Eu@Zn-MOF** hydrostability.

Fig. S9 Calibration curves with linear fit at 616 nm ( $\lambda_{ex}$  = 260 nm) of **Eu@Zn-LMOF** dispersed in EtOH-H<sub>2</sub>O (v/v, 8/2) by adding F<sup>-</sup> ions with (□) and without (■) interfering anions (1.0 mM each).

Fig. S10 IR spectra of as-synthesised **Zn-LMOF** and, **Eu@Zn-LMOF** treated with NaF for 12 h.

Fig. S11 SEM-EDS **Eu@Zn-LMOF** after F<sup>-</sup> detection.

## General Considerations

### Materials and methods

All reagents and reactants were purchased directly by commercial approach and were used without any purification. The raw materials were  $\text{Zn}(\text{NO}_3)_2 \cdot 6\text{H}_2\text{O}$  (Aldrich, 98%), benzene-1,4-dicarboxylic acid (Aldrich,  $\geq 98\%$ ),  $\text{EuCl}_3 \cdot 6\text{H}_2\text{O}$  (Aldrich, 99.9%), *N,N*-dimethylformamide, (99%) methanol (Tecsiquim, 99.8%), ethanol (Tecsiquim, 99.8%), dimethyl formamide (Aldrich, 99.8%), acetonitrile (Tecsiquim,  $\geq 99.5\%$ ), butanol (Tecsiquim,  $\geq 99.4\%$ ), carbon tetrachloride (Tecsiquim,  $>99\%$ ), chloroform (Tecsiquim, 99.7%), dichloromethane (Tecsiquim,  $\geq 99.5\%$ ), THF (Tecsiquim,  $>99\%$ ), DMA (Aldrich, 99.8%), acetone (Tecsiquim,  $\geq 99.5\%$ ). All anions tested were used as sodium salts, chloride (Aldrich, 99.0%), bromide (Fluka 99.9 %), iodide, cyanide (Aldrich, 95%), sulfate (Tecsiquim,  $\geq 99\%$ ) pyrophosphate decahydrate (Aldrich,  $\geq 99.9\%$ ), nitrate (Aldrich,  $\geq 99\%$ ), arsenate dibasic heptahydrate (Aldrich,  $\geq 98\%$ ), acetate (Sigma-Aldrich, 99.5%),

The FT-IR spectrum was recorded in the range of  $4000\text{--}600\text{ cm}^{-1}$  by using the standard Pike ATR cell on a Bruker Tensor 27 FT-IR spectrophotometer (Bruker Optik GmbH, Ettlingen, Germany).

Elemental analysis for C, H, and N were carried out by standard methods using a Vario Micro-Cube analyzer.

Powder X-ray diffraction (PXRD) was conducted using a Bruker D8 ADVANCE X-ray powder diffractometer ( $\text{Cu-K}\alpha$ ,  $\lambda = 1.5418\text{ \AA}$ ) (Bruker AXS GmbH, Karlsruhe, Germany) with the  $2\theta$  range of  $5\text{--}50^\circ$ .

Thermogravimetric analyses were performed using a Netzsch model STA 449 F3 Jupiter equipment, under a dinitrogen atmosphere, at a heating rate of  $10\text{ }^\circ\text{C min}^{-1}$ , and from  $25$  to  $450\text{ }^\circ\text{C}$ . SEM-EDS. Morphological changes of **Zn-LMOF** and **Eu@Zn-LMOF** before and after the contact with fluoride solutions were evaluated by Scanning Electron Microscopy (SEM) on a JEOL (JSM-6610) microscope. For sample preparation, the specimen was dried and fixed on a stub with carbon double-stick tape and then coated with gold for 90 seconds under vacuum using a Denton IV sputtering chamber. Elemental chemical distribution analysis was performed with an energy-dispersive X-ray spectroscopy QUANTAX 200 from Bruker attached to SEM.

Elemental analyses were recorded on Thermo Scientific/Flash 2000 elemental analyzer. Luminescence spectra were recorded on a Varian Cary Eclipse spectrophotometer equipped with a thermostated cell holder. UV-Vis spectra were recorded on an Agilent Cary 100 UV-VIS spectrophotometer.

Ball milling for the preparation of the **Eu@Zn-LMOF** was performed using a Planetary Micro Mill Pulverisette<sup>TM</sup> 7 Fritsch device (Idar-Oberstein, Germany)

**Table S1.** Crystal data and structure refinement for **Zn-LMOF**.

|                                   |                                                                                                    |
|-----------------------------------|----------------------------------------------------------------------------------------------------|
| Empirical formula                 | C <sub>29.20</sub> H <sub>27.60</sub> O <sub>14.60</sub> Zn <sub>3</sub>                           |
| Formula weight                    | 808.22                                                                                             |
| Temperature                       | 100(2) K                                                                                           |
| Wavelength                        | 0.71073 Å                                                                                          |
| Crystal system                    | Monoclinic                                                                                         |
| Space group                       | C2/c                                                                                               |
| Unit cell dimensions              | a = 20.1166(14) Å, α = 90°.<br>b = 10.6178(7) Å, β = 108.3899(12)°.<br>c = 16.0756(11) Å, γ = 90°. |
| Volume                            | 3258.3(4) Å <sup>3</sup>                                                                           |
| Z                                 | 4                                                                                                  |
| Density (calculated)              | 1.648 Mg/m <sup>3</sup>                                                                            |
| Absorption coefficient            | 2.260 mm <sup>-1</sup>                                                                             |
| F(000)                            | 1638                                                                                               |
| Crystal size                      | 0.280 x 0.149 x 0.096 mm <sup>3</sup>                                                              |
| Theta range for data collection   | 2.134 to 27.443°.                                                                                  |
| Index ranges                      | -26 ≤ h ≤ 26, -13 ≤ k ≤ 13, -20 ≤ l ≤ 20                                                           |
| Reflections collected             | 34640                                                                                              |
| Independent reflections           | 3718 [R(int) = 0.0316]                                                                             |
| Completeness to theta = 25.242°   | 99.8 %                                                                                             |
| Absorption correction             | None                                                                                               |
| Refinement method                 | Full-matrix least-squares on F <sup>2</sup>                                                        |
| Data / restraints / parameters    | 3718 / 361 / 326                                                                                   |
| Goodness-of-fit on F <sup>2</sup> | 1.068                                                                                              |
| Final R indices [I > 2σ(I)]       | R1 = 0.0456, wR2 = 0.1230                                                                          |
| R indices (all data)              | R1 = 0.0488, wR2 = 0.1257                                                                          |
| Extinction coefficient            | n/a                                                                                                |
| Largest diff. peak and hole       | 2.473 and -0.757 e.Å <sup>-3</sup>                                                                 |

**Table S2.** Selected bond distances (Å) and angles (°) around Zn atoms.

| Bonding      | Distance (Å) | Bonding          | Angle (°)  |
|--------------|--------------|------------------|------------|
| Zn(1)-O(5)   | 1.855(9)     | O(5)-Zn(1)-O(1)  | 121.3(3)   |
| Zn(1)-O(6A)  | 1.940(13)    | O(5)-Zn(1)-O(4)  | 125.6(3)   |
| Zn(1)-O(1)   | 1.945(2)     | O(9A)-Zn(1)-O(4) | 105.2(4)   |
| Zn(1)-O(4)#1 | 1.962(2)     | O(1)-Zn(1)-O(4)  | 108.82(12) |
| Zn(1)-O(6)   | 2.063(6)     | O(5)-Zn(1)-O(9)  | 98.8(3)    |
| Zn(1)-H(6)   | 1.97(8)      | O(1)-Zn(1)-O(9)  | 91.45(18)  |
| Zn(1)-H(6A)  | 2.10(3)      | O(4)-Zn(1)-O(9)  | 99.8(2)    |
| Zn(2)-O(2)   | 2.078(2)     | O(2)-Zn(2)-O(2)  | 180.0      |
| Zn(2)-O(3)   | 2.090(3)     | O(2)-Zn(2)-O(3)  | 91.62(12)  |
|              |              | O(3)-Zn(2)-O(3)  | 180.00(11) |

**Table S3.** Analytical parameters of recent luminescent materials for F<sup>-</sup> sensing in aqueous dispersions.

| Material                                                 | Stern-Volmer constant (M <sup>-1</sup> ) | LOD (mol/L)           | $\lambda_{em}$ (nm) | Ref.      |
|----------------------------------------------------------|------------------------------------------|-----------------------|---------------------|-----------|
| *Eu-MOF                                                  | -                                        | 1.14×10 <sup>-6</sup> | 425                 | [1]       |
| FS@UiO-66                                                | -                                        | 4.40×10 <sup>-4</sup> | 537                 | [2]       |
| [Cu <sub>4</sub> I(TIPE) <sub>3</sub> ] <sub>3</sub> ·3I | -                                        | 2.11×10 <sup>-6</sup> | 450                 | [3]       |
| TMU-31                                                   | 2.53×10 <sup>3</sup>                     | -                     | 375                 | [4]       |
| **Eu-MOF                                                 | -                                        | 8.30×10 <sup>-5</sup> | 625                 | [5]       |
| <b>Eu@Zn-LMOF</b>                                        | 7.27×10 <sup>3</sup>                     | 1.37×10 <sup>-5</sup> | 616                 | This work |

\*Eu-MOF (L= 2-aminoterephthalic acid); FS@UiO-66 (FS=Fluorescein; UiO-66 =MOF-5); TIPE = tetra(3-imidazolylphenyl) ethylene; TMU-31 (L=4,4'-(carbonylbis(azanediyl)dibenzoic acid); \*\*Eu-MOF (L= 5-boronisophthalic acid)

[1] H. Che, Y. Li, S. Zhang, W. Chen, X. Tian, C. Yang, L. Lu, Z. Zhou and Y. Nie, *Sens. Act. B Chem.*, 2020, **324**, 128641.

[2] X. Zhao, Y. Wang, X. Hao and W. Liu, *Appl. Surf. Sci.*, 2017, **402**, 129-135.

[3] H. Chen, P. X. Liu, S. P. Zhuo, X. Meng, Z. Y. Zhou and H. N. Wang, *Inorg. Chem. Commun.*, 2016, **63**, 69-73.

[4] M. Sharafizadeh, J. Mokhtari, H. Saeidian and Z. Mirjafary, *Environ. Sci. Pollut. Res. Int.*, 2020, **27**, 25132-25139.

[5] Z. R. Yang, M. M. Wang, X. S. Wang and X. B. Yin, *Anal. Chem.*, 2017, **89**, 1930-1936.

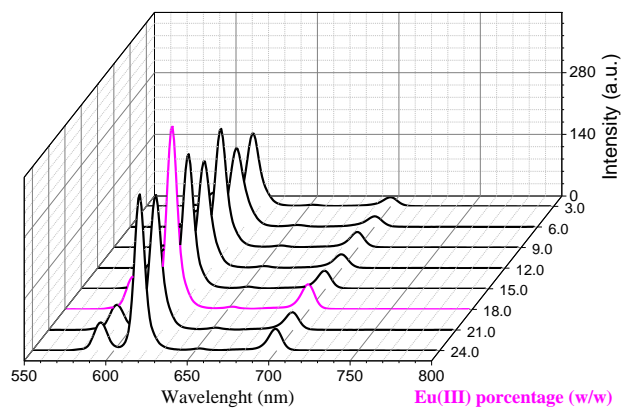

**Fig. S1.** Emission spectra for **Eu<sub>3-24%</sub>@Zn-LMOF** ( $\lambda_{\text{ex}} = 260$  nm).

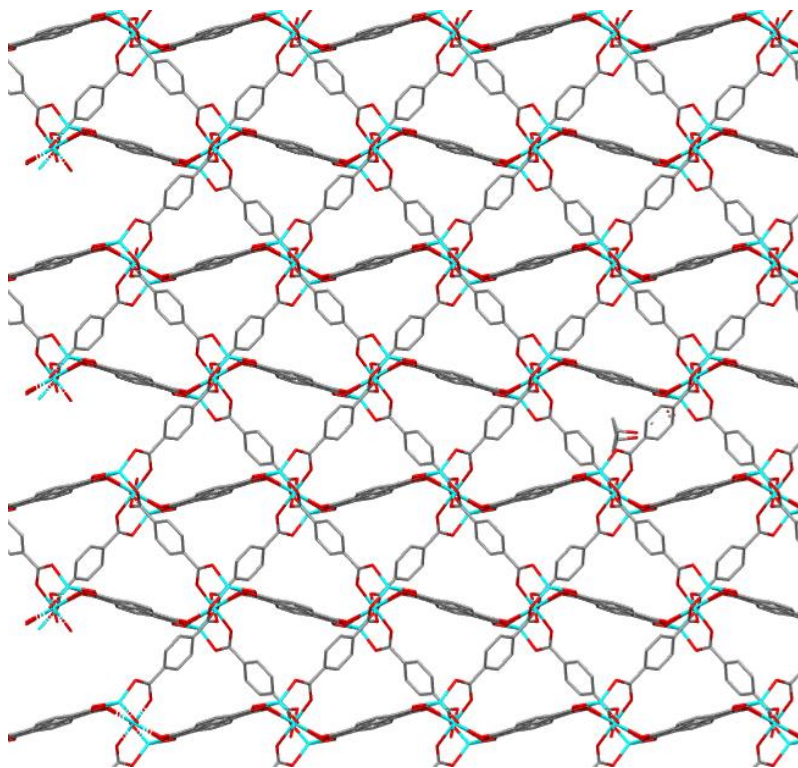

**Fig. S2.** The 3D diagram from crystal structure of **Zn-LMOF**.

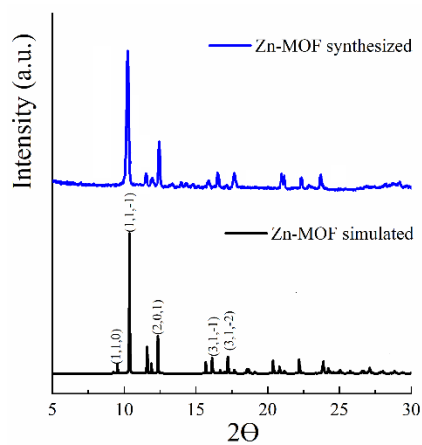

**Fig. S3.** Simulated and experimental powder X-ray diffraction patterns of **Zn-LMOF**.

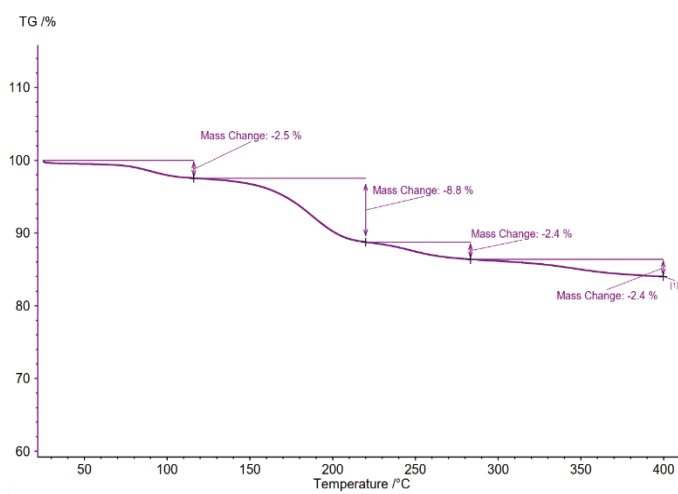

**Fig. S4.** TGA curve of **Zn-LMOF**

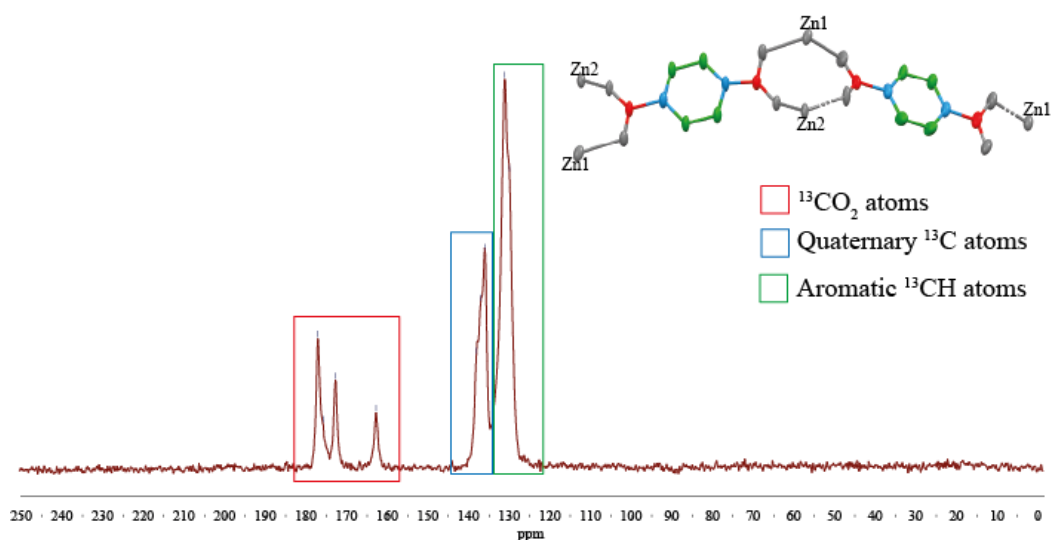

**Fig. S5.**  $^{13}\text{C}$  ss-CPMAS NMR (spinning rate at 8 kHz) spectrum for **Zn-LMOF** and the asymmetric unit from the crystal structure (above). Solvent molecules are omitted for clarity.

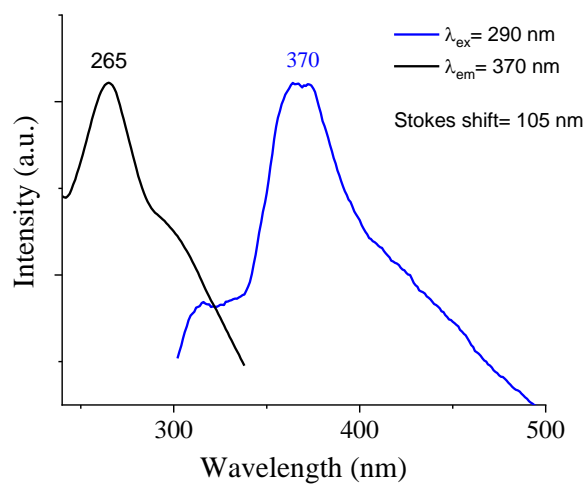

**Fig. S6.** Solid-state excitation (black) and emission (blue) spectra of **Zn-LMOF** at room temperature.

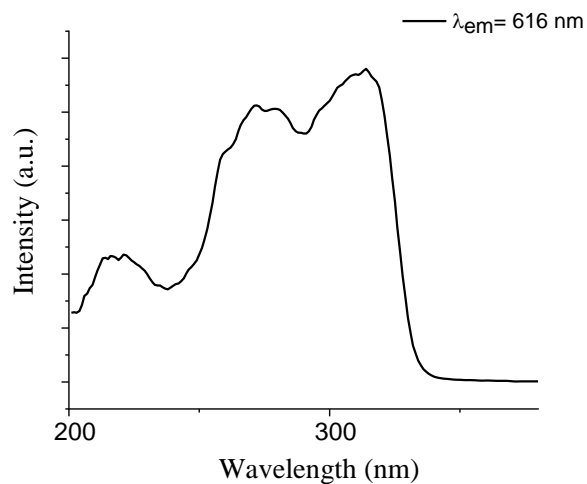

**Fig. S7.** Excitation spectrum of **Eu@Zn-LMOF** at room temperature by monitoring the Eu(III) ions ( $\lambda_{em}$  = 616 nm).

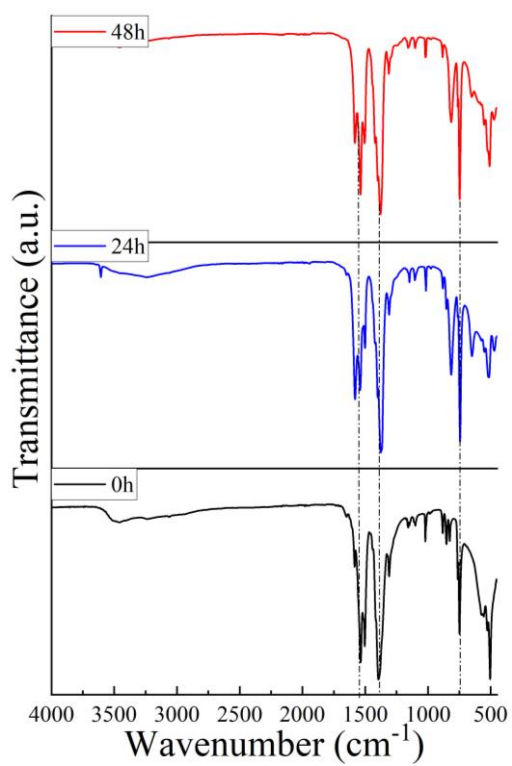

**Fig. S8.** ATR-FTIR spectra to assess the **Eu@Zn-MOF** hydrostability.



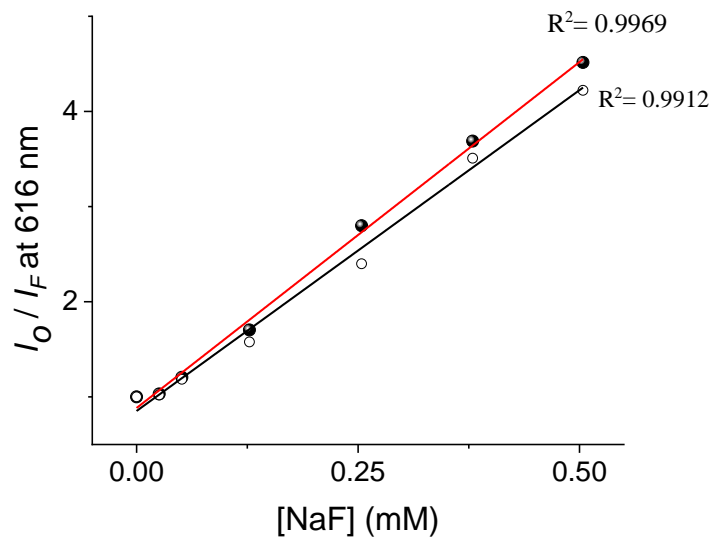

**Fig. S9.** Calibration curves with linear fit at 616 nm ( $\lambda_{ex} = 260$  nm) of **Eu@Zn-LMOF** dispersed in EtOH-H<sub>2</sub>O (v/v, 8/2) by adding F<sup>-</sup> ions with (○) and without (●) interfering anions (Cl<sup>-</sup>, Br<sup>-</sup>, I<sup>-</sup>, NO<sub>3</sub><sup>-</sup>, AcO<sup>-</sup>, H<sub>2</sub>PO<sub>4</sub><sup>-</sup>, H<sub>3</sub>P<sub>2</sub>O<sub>7</sub><sup>-</sup>, and SO<sub>4</sub><sup>2-</sup>; [X<sup>-</sup>] = 1.0 mM each one).

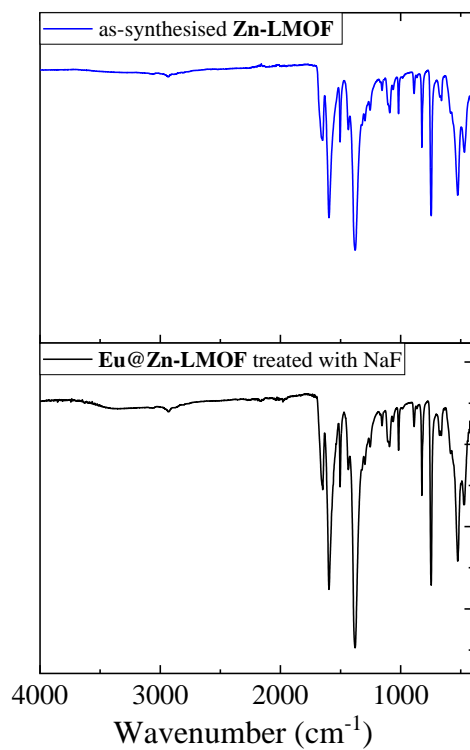

**Fig. S10.** IR spectra of as-synthesised **Zn-LMOF** and, **Eu@Zn-LMOF** treated with NaF for 12 h.

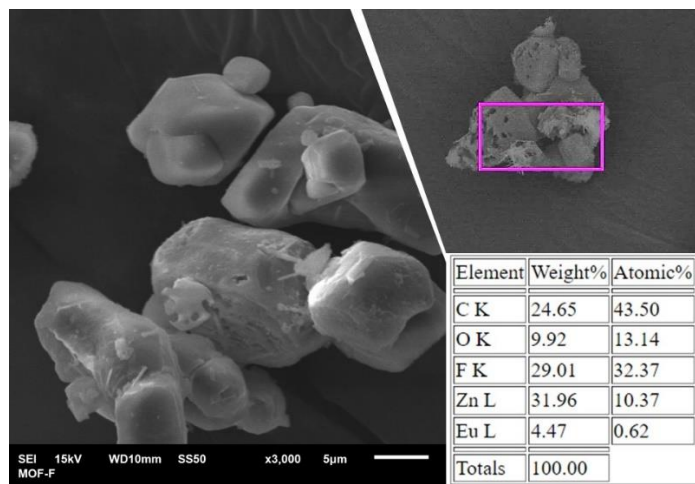

**Fig. S11** SEM-EDS **Eu@Zn-LMOF** after  $F^-$  detection.
